# Supplementary material for: Systematic Review and Meta-analyses of the Effect of Chemotherapy on Pulmonary Mycobacterium abscessus Outcomes and Disease Recurrence
Source: PubMed Central journal article supplement (PMC5655093; doi:10.1128/aac.01206-17), 2017-10-24
Supplement: AAC.01206-17_zac011176607s1.pdf [file AAC.01206-17_zac011176607s1.pdf]

1 **Supplemental methods and results**

2  
3 **Systematic review and meta-analyses of the effect of chemotherapy on pulmonary**  
4 ***Mycobacterium abscessus* outcomes and disease recurrence**

5  
6 Jotam G. Pasipanodya<sup>1</sup>, Deborah Ogbonna<sup>1</sup>, Beatrix E. Ferro<sup>2</sup>, Gesham Magombedze<sup>1</sup>,  
7 ShashiKanti Srivastava<sup>1</sup>, Devyani Deshpande<sup>1</sup>, Tawanda Gumbo<sup>1,3</sup>

8  
9 1. Center for Infectious Diseases Research and Experimental Therapeutics (CIDRET),  
10 Baylor Research Institute, 3434 Live Oak Street, Dallas, 75204, Texas

11 2. Universidad ICESI

12 3. Department of Medicine, University of Cape Town, Observatory, Cape Town, South  
13 Africa.

14  
15 Corresponding Author,

16 Tawanda Gumbo, MD

17 CIDRET, Baylor University Medical Center, 3434 Live Oak Street,

18 Dallas, 75204, Texas, USA

19 Phone: 214 820 9561

20 Fax: 214 820 4813

21 Email: [Tawanda.gumbo@BSWHealth.org](mailto:Tawanda.gumbo@BSWHealth.org)

22  
23  
24  
25  
26  
27  
28 **Contents**

29 Search strategy

**Page**

1

30 Supplemental Figure S1

2

31 Supplemental Figure S2

3

32 Supplemental Figure S3

4

33 Supplemental Figure S4

5

34 Supplemental Figure S5

6 &7

35 Supplemental Figure S6

8-10

36  
37  
38  
39  
40  
41  
42  
43  
44  
45  
46  
47  
48

49 **Supplemental methods**

50

51 Search strategy in PubMed, EMBASE and Grey Literature

52

53

54 "*Mycobacterium massiliense*"[All Fields] OR "*Mycobacterium abscessus*"[All Fields] OR

55 "*Mycobacterium bolletii*"[All Fields]

56

57

58 AND

59

60

61 (("therapy"[Subheading] OR "therapy"[All Fields] OR "therapeutics"[MeSH Terms] OR

62 "therapeutics"[All Fields]) AND ("therapy"[Subheading] OR "therapy"[All Fields] OR

63 "treatment"[All Fields] OR "therapeutics"[MeSH Terms] OR "therapeutics"[All Fields]))

64

65

66 AND

67

68

69

70 (outcome [All Fields] OR outcomes [All Fields])

71

72 Variations of the above were used as free text in EMBASE and the Grey literature, with

73 Boolean combinations used.

74

75

76

77

78

79

80

81

82

83

84

85

86

87

88

89

90

91

92

93

94

95

96

97

98

99

100 **Supplemental results**

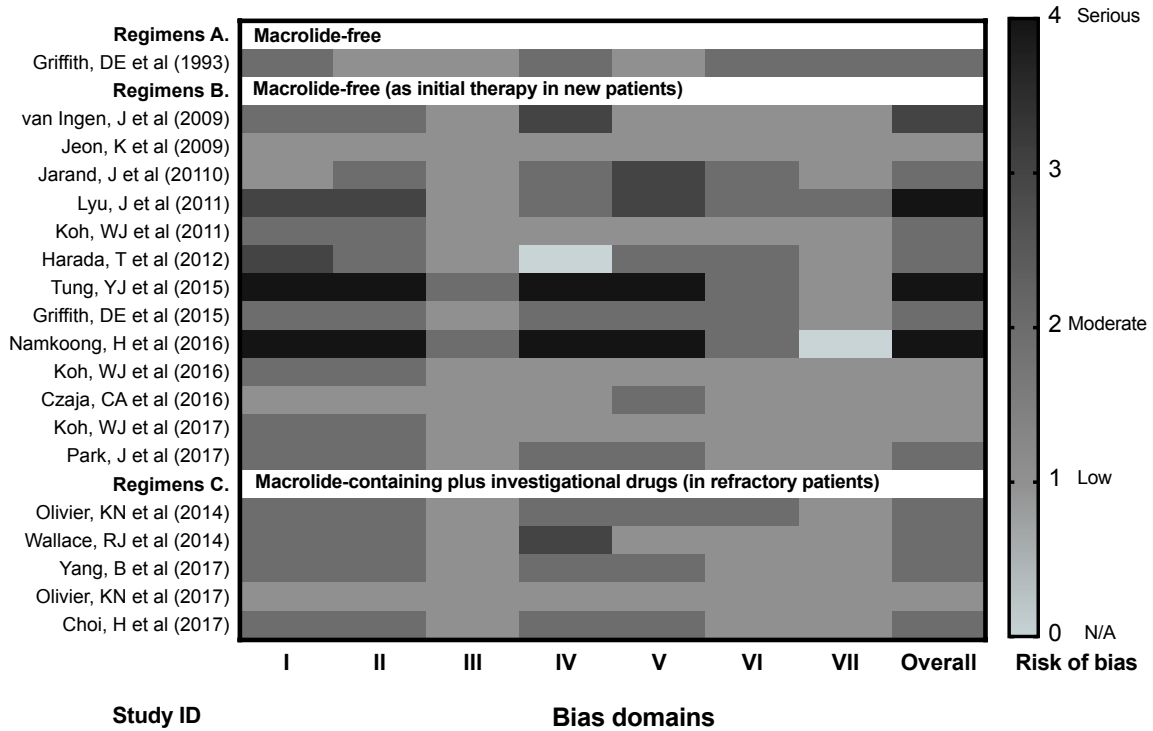

101  
102  
103  
104  
105  
106  
107  
108  
109  
110  
111  
112  
113  
114  
115  
116

**Supplemental Figure S1 Risk of bias in selected studies**

Supplemental Figure S1 shows is a heat map showing changes in risk of bias within each study across the VII domains tested for bias. Lighter shades indicate low risk of bias and darker shades indicate higher risk of bias.

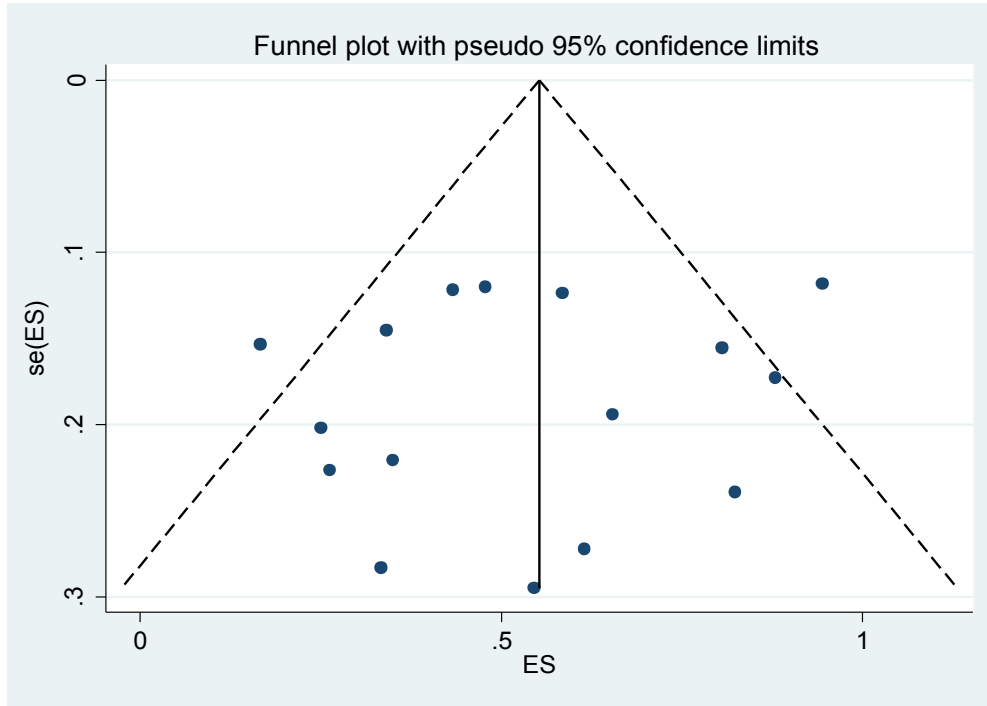

117  
 118  
 119  
 120  
 121  
 122  
 123  
 124  
 125  
 126

**Supplemental Figure S2. Publication bias and small study effect plot in initial macrolide-free regimens.**

The precision in the estimation of effect increased as the size of each study increased; slope 0.68 (95% CI, 0.21-1.15),  $p=0.008$ . The null hypothesis for Egger's test is that symmetry exists in the funnel plot, with the alternative indicating that asymmetry is present. The  $p$ -value for Egger's test in this case was 0.541, indicating that there was no apparent bias in the meta-analysis

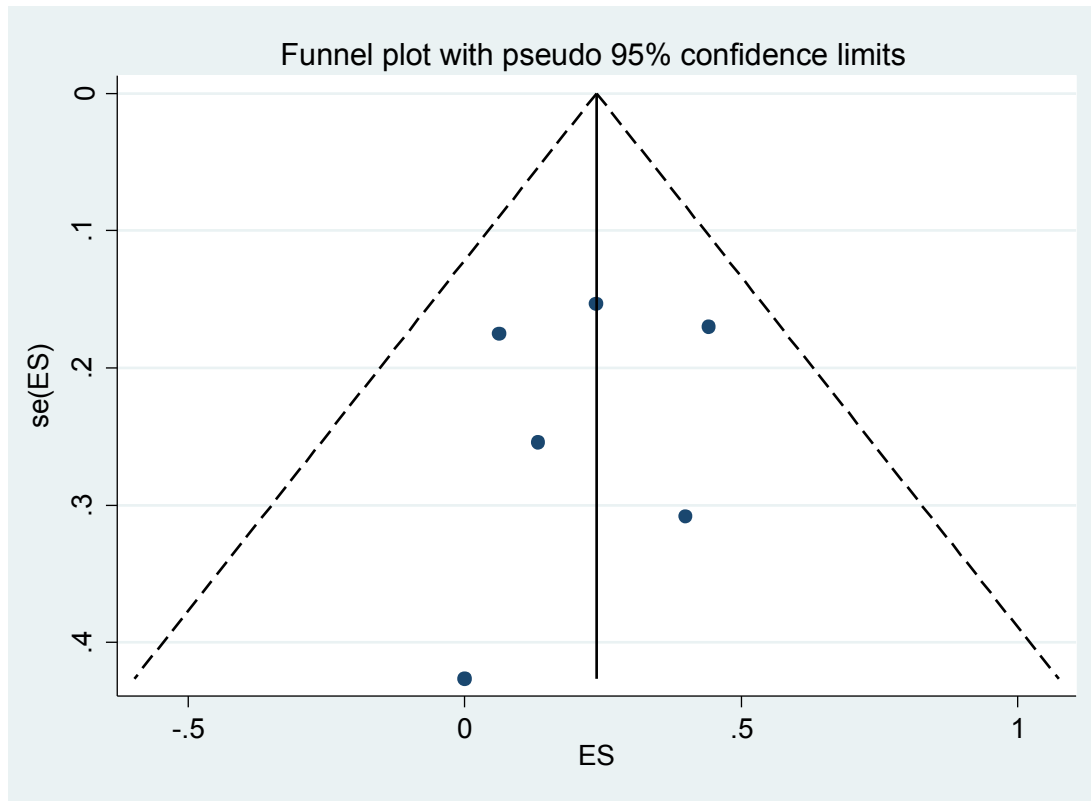

127  
 128  
 129  
 130  
 131  
 132  
 133  
 134

**Supplemental Figure S3. Publication bias and small study effect plot in macrolide-containing regimens in refractory pulmonary *Mycobacterium abscessus* patients.**

The slope was 0.33 (95% CI, -0.32-0.99),  $p=0.236$ . Egger test for small study effect revealed  $p$ -value of 0.711; however, the small number of studies (5) and marked heterogeneity potentially biases the Egger tests.

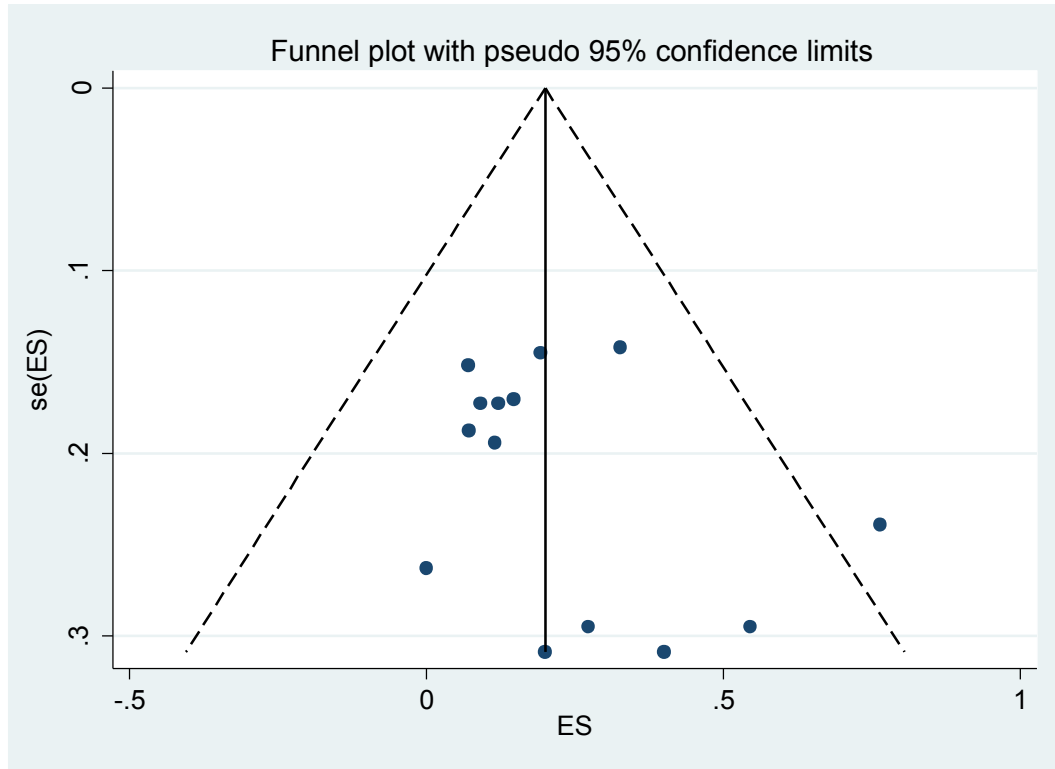

135  
 136  
 137  
 138  
 139  
 140  
 141  
 142  
 143

**Supplemental Figure S4. Publication bias and small study effect plot of disease recurrence.**

The slope was -0.01 (95% CI, -0.40-0.37),  $p=0.236$ . Egger test for small study effect revealed  $p$ -value of 0.233; however, significant heterogeneity potentially biases the Egger tests.

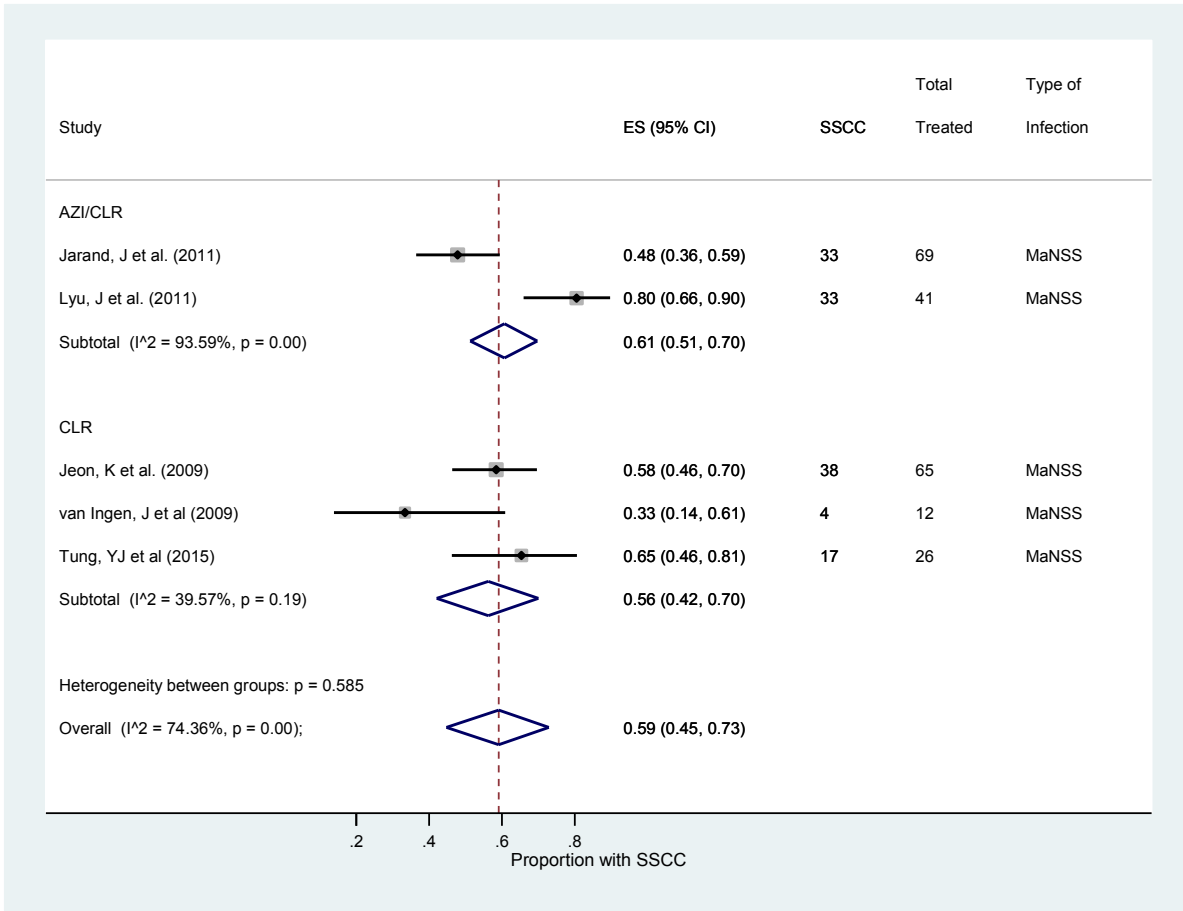

144  
 145  
 146  
 147  
 148  
 149  
 150  
 151  
 152  
 153  
 154

**Supplemental Figure S5 Comparison of macrolides across *Mycobacterium abscessus* species.**

The forest plot in **Figure S5A** shows that there was no significant difference in sustained sputum conversion (SSCC) in patients with *Mycobacterium abscessus* no species specified (MaNSS) between those treated with clarithromycin regimens compared to those treated with azithromycin/clarithromycin.

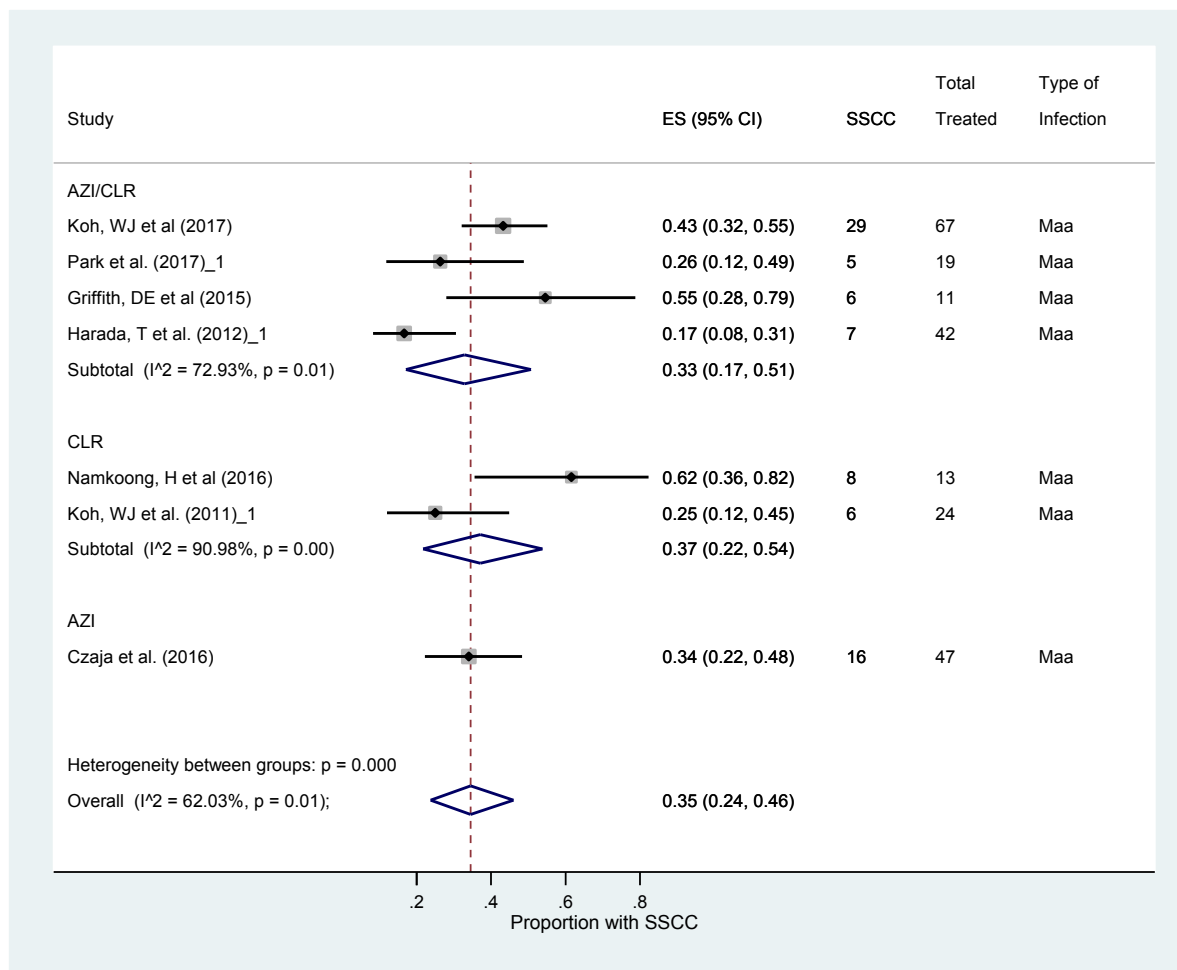

155  
156  
157  
158  
159  
160  
161  
162  
163  
164  
165  
166

**Supplemental Figure S5 Comparison of macrolides across *Mycobacterium abscessus* species.**

The forest plot in **Figure S5B** shows that there was no significant difference in sustained sputum conversion (SSCC) in patients with *Mycobacterium abscessus* subspecies *abscessus* (Maa) between those treated with clarithromycin regimens compared to those treated with azithromycin/clarithromycin. Supplementary Figure S5A Comparison of clarithromycin versus azithromycin/clarithromycin



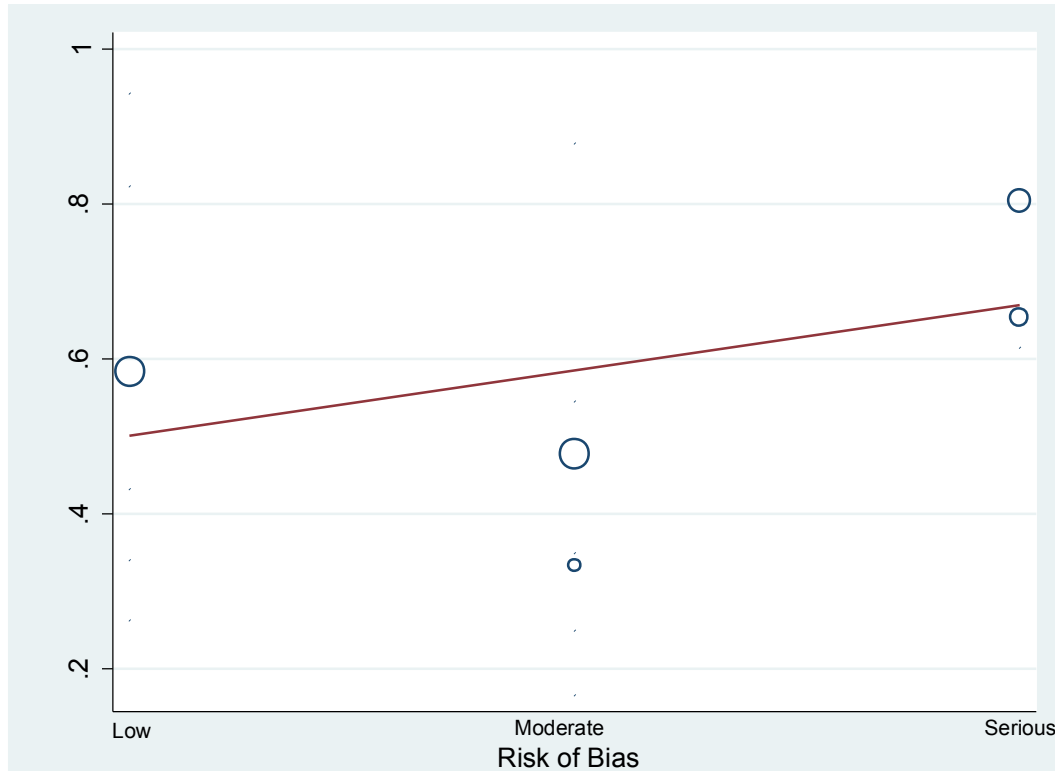

167  
 168  
 169  
 170  
 171  
 172  
 173  
 174

**Supplemental Figure S6 Metaregression of the effect of risk of bias on sustained sputum conversion.**

**Figure S6A** shows that there was no significant association between SSCC and risk of bias when the size of the study was adjusted for: estimate for the slope was 0.08 (95% CI, -0.21-0.37),  $p=0.426$ .

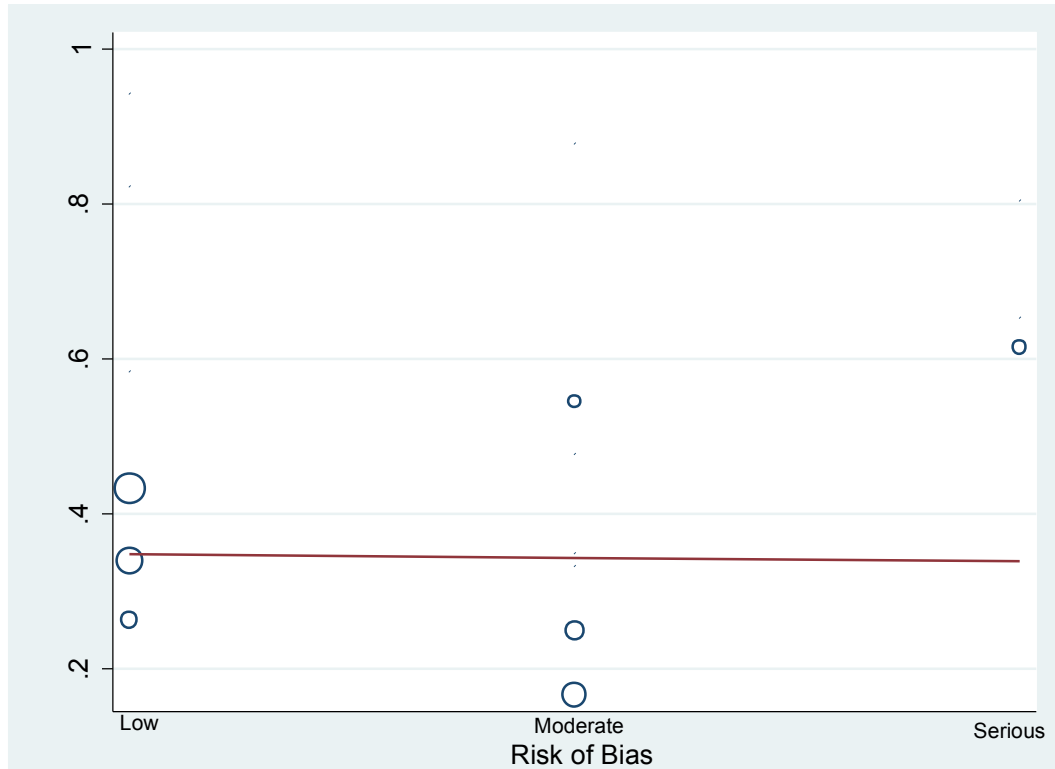

175  
 176  
 177  
 178  
 179  
 180  
 181  
 182  
 183  
 184

**Supplemental Figure S6 Metaregression of the effect of risk of bias on sustained sputum conversion.**

**Figure S6B** shows that there was no significant association between SSCC and risk of bias when the size of the study was adjusted for: estimate for the slope was 0.00 (95% CI, -0.29-0.28),  $p=0.969$ .

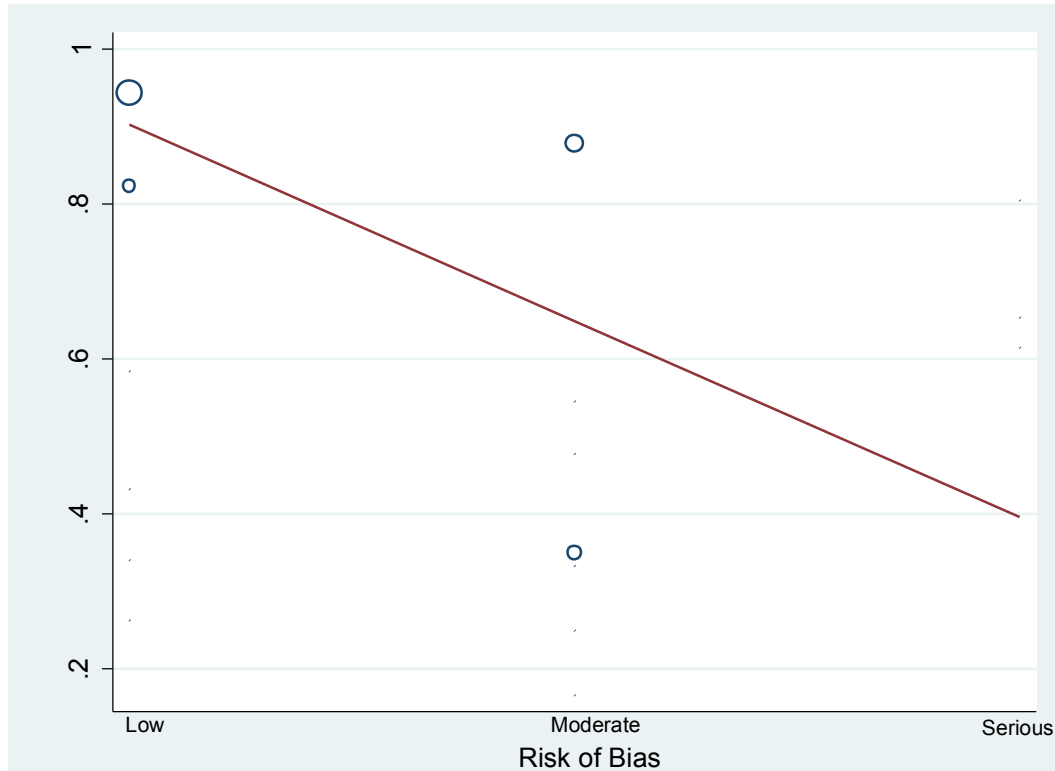

185  
 186  
 187  
 188  
 189  
 190  
 191  
 192  
 193  
 194  
 195  
 196  
 197  
 198  
 199  
 200  
 201  
 202  
 203  
 204  
 205  
 206  
 207  
 208  
 209  
 210  
 211  
 212

**Supplemental Figure S6 Metaregression of the effect of risk of bias on sustained sputum conversion.**

**Figure S6C** shows that there was no significant association between SSCC and risk of bias when the size of the study was adjusted for: estimate for the slope was -0.25 (95% CI, -1.37-0.87),  $p=0.433$ .

213 **Supplemental references**

214

215

216

217

218

219

220

221

222

223

224

225

226

227

228

229

230

231

232

233

234

235

236

237

238

239

240

241

242

243

244

245

246

247

248

249

250

251

252

253

254

255

256

257

258

259

1. **Griffith, D. E., W. M. Girard, and R. J. Wallace, Jr.** 1993. Clinical features of pulmonary disease caused by rapidly growing mycobacteria. An analysis of 154 patients. *Am Rev Respir Dis* **147**:1271-1278.
2. **van Ingen, J., Z. R. de Zwaan, R. P. Dekhuijzen, M. J. Boeree, and S. D. van Soolingen.** 2009. Clinical relevance of *Mycobacterium chelonae-abscessus* group isolation in 95 patients. *J Infect* **59**:324-331.
3. **Jeon, K., O. J. Kwon, N. Y. Lee, B. J. Kim, Y. H. Kook, S. H. Lee, Y. K. Park, C. K. Kim, and W. J. Koh.** 2009. Antibiotic treatment of *Mycobacterium abscessus* lung disease: a retrospective analysis of 65 patients. *Am J Respir Crit Care Med* **180**:896-902.
4. **Jarand, J., A. Levin, L. Zhang, G. Huitt, J. D. Mitchell, and C. L. Daley.** 2011. Clinical and microbiologic outcomes in patients receiving treatment for *Mycobacterium abscessus* pulmonary disease. *Clin Infect Dis* **52**:565-571.
5. **Lyu, J., H. J. Jang, J. W. Song, C. M. Choi, Y. M. Oh, S. D. Lee, W. S. Kim, D. S. Kim, and T. S. Shim.** 2011. Outcomes in patients with *Mycobacterium abscessus* pulmonary disease treated with long-term injectable drugs. *Respir Med* **105**:781-787.
6. **Koh, W. J., K. Jeon, N. Y. Lee, B. J. Kim, Y. H. Kook, S. H. Lee, Y. K. Park, C. K. Kim, S. J. Shin, G. A. Huitt, C. L. Daley, and O. J. Kwon.** 2011. Clinical significance of differentiation of *Mycobacterium massiliense* from *Mycobacterium abscessus*. *Am J Respir Crit Care Med* **183**:405-410.
7. **Harada, T., Y. Akiyama, A. Kurashima, H. Nagai, K. Tsuyuguchi, T. Fujii, S. Yano, E. Shigeto, T. Kuraoka, A. Kajiki, Y. Kobashi, F. Kokubu, A. Sato, S. Yoshida, T. Iwamoto, and H. Saito.** 2012. Clinical and microbiological differences between *Mycobacterium abscessus* and *Mycobacterium massiliense* lung diseases. *J Clin Microbiol* **50**:3556-3561.
8. **Tung, Y. J., S. O. Bittaye, J. R. Tsai, C. Y. Lin, C. H. Huang, T. C. Chen, W. R. Lin, K. Chang, C. C. Lai, P. L. Lu, and Y. H. Chen.** 2015. Risk factors for microbiologic failure among Taiwanese adults with *Mycobacterium abscessus* complex pulmonary disease. *J Microbiol Immunol Infect* **48**:437-445.
9. **Griffith, D. E., J. V. Philley, B. A. Brown-Elliott, J. L. Benwill, S. Shepherd, D. York, and R. J. Wallace, Jr.** 2015. The significance of *Mycobacterium abscessus* subspecies *abscessus* isolation during *Mycobacterium avium* complex lung disease therapy. *Chest* **147**:1369-1375.
10. **Namkoong, H., K. Morimoto, T. Nishimura, H. Tanaka, H. Sugiura, Y. Yamada, A. Kurosaki, T. Asakura, S. Suzuki, H. Fujiwara, K. Yagi, M. Ishii, S. Tasaka, T. Betsuyaku, Y. Hoshino, A. Kurashima, and N. Hasegawa.** 2016. Clinical efficacy and safety of multidrug therapy including thrice weekly intravenous amikacin administration for *Mycobacterium abscessus* pulmonary disease in outpatient settings: a case series. *BMC Infect Dis* **16**:396.
11. **Koh, W. J., B. H. Jeong, K. Jeon, S. Y. Kim, K. U. Park, H. Y. Park, H. J. Huh, C. S. Ki, N. Y. Lee, S. H. Lee, C. K. Kim, C. L. Daley, S. J. Shin, H. Kim, and O. J. Kwon.** 2016. Oral Macrolide Therapy Following Short-term

- 260 Combination Antibiotic Treatment of *Mycobacterium massiliense* Lung  
261 Disease. Chest **150**:1211-1221.
- 262 12. **Czaja, C. A., A. R. Levin, C. W. Cox, D. Vargas, C. L. Daley, and G. R.**  
263 **Cott.** 2016. Improvement in Quality of Life after Therapy for *Mycobacterium*  
264 *abscessus* Group Lung Infection. A Prospective Cohort Study. Ann Am  
265 Thorac Soc. **13**:40-48.
- 266 13. **Koh, W. J., B. H. Jeong, S. Y. Kim, K. Jeon, K. U. Park, B. W. Jhun, H.**  
267 **Lee, H. Y. Park, D. H. Kim, H. J. Huh, C. S. Ki, N. Y. Lee, H. K. Kim, Y. S.**  
268 **Choi, J. Kim, S. H. Lee, C. K. Kim, S. J. Shin, C. L. Daley, H. Kim, and O.**  
269 **J. Kwon.** 2017. Mycobacterial Characteristics and Treatment Outcomes in  
270 *Mycobacterium abscessus* Lung Disease. Clin Infect Dis **64**:309-316.
- 271 14. **Park, J., J. Cho, C. H. Lee, S. K. Han, and J. J. Yim.** 2017. Progression and  
272 Treatment Outcomes of Lung Disease Caused by *Mycobacterium abscessus*  
273 and *Mycobacterium massiliense*. Clin Infect Dis **64**:301-308.
- 274 15. **Olivier, K. N., P. A. Shaw, T. S. Glaser, D. Bhattacharyya, M. Fleshner, C.**  
275 **C. Brewer, C. K. Zalewski, L. R. Folio, J. R. Siegelman, S. Shallom, I. K.**  
276 **Park, E. P. Sampaio, A. M. Zelazny, S. M. Holland, and D. R. Prevots.**  
277 2014. Inhaled amikacin for treatment of refractory pulmonary nontuberculous  
278 mycobacterial disease. Ann Am Thorac Soc. **11**:30-35.
- 279 16. **Wallace, R. J., Jr., G. Dukart, B. A. Brown-Elliott, D. E. Griffith, E. G.**  
280 **Scerpella, and B. Marshall.** 2014. Clinical experience in 52 patients with  
281 tigecycline-containing regimens for salvage treatment of *Mycobacterium*  
282 *abscessus* and *Mycobacterium chelonae* infections. J Antimicrob Chemother.  
283 **69**:1945-1953.
- 284 17. **Yang, B., Jhun, B. W., Moon, S. M., Lee, H., Park, H. Y., Jeon, K., Kim, D.**  
285 **H., Kim, S. Y., Shin, S. J., Daley, C. L., and Koh, W. J. A.** 2017.  
286 Clofazimine-Containing Regimen for the Treatment of *Mycobacterium*  
287 *abscessus* Lung Disease. Antimicrob Agents Chemother **61**: e02052-16.
- 288 18. **Olivier, K. N., D. E. Griffith, G. Eagle, J. P. McGinnis, L. Micioni, K. Liu, C.**  
289 **L. Daley, K. L. Winthrop, S. Ruoss, D. J. Addrizzo-Harris, P. A. Flume, D.**  
290 **Dorgan, M. Salathe, B. A. Brown-Elliott, R. Gupta, and R. J. Wallace, Jr.**  
291 2017. Randomized Trial of Liposomal Amikacin for Inhalation in  
292 Nontuberculous Mycobacterial Lung Disease. Am J Respir Crit Care Med  
293 **195**:814-823.
- 294 19. **Choi, H., S. Y. Kim, H. Lee, B. W. Jhun, H. Y. Park, K. Jeon, D. H. Kim, H.**  
295 **J. Huh, C. S. Ki, N. Y. Lee, S. H. Lee, S. J. Shin, C. L. Daley, and W. J.**  
296 **Koh.** 2017. Clinical Characteristics and Treatment Outcomes of Patients with  
297 Macrolide-Resistant *Mycobacterium massiliense* Lung Disease. Antimicrob  
298 Agents Chemother. **61**:e02189-16  
299
